# Supplementary material
Source: PubMed Central journal article supplement (PMC7055365)
Supplement: develop-146-183400-s1.pdf [file develop-146-183400-s1.pdf]

Supplement Figure 1

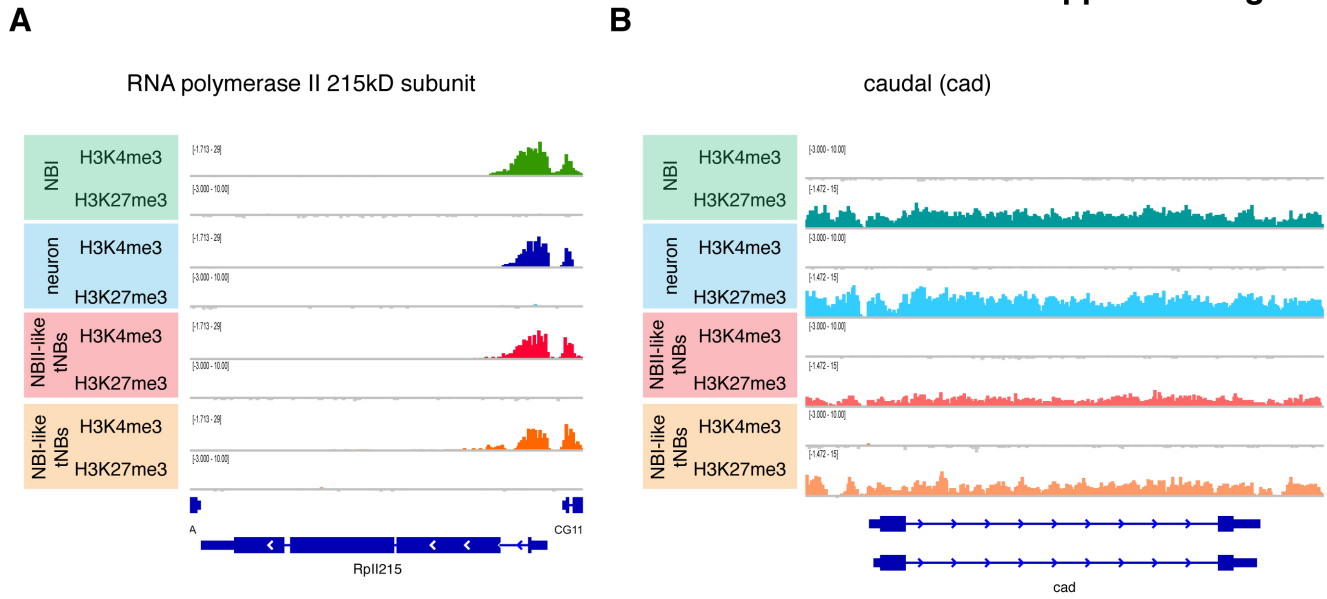

**Figure S1. Examples of H3K4me3 and H3K27me3-dependent gene loci.**

H3K4me3 and H3K27me3 distribution of RpLL215 (A), caudal (B).

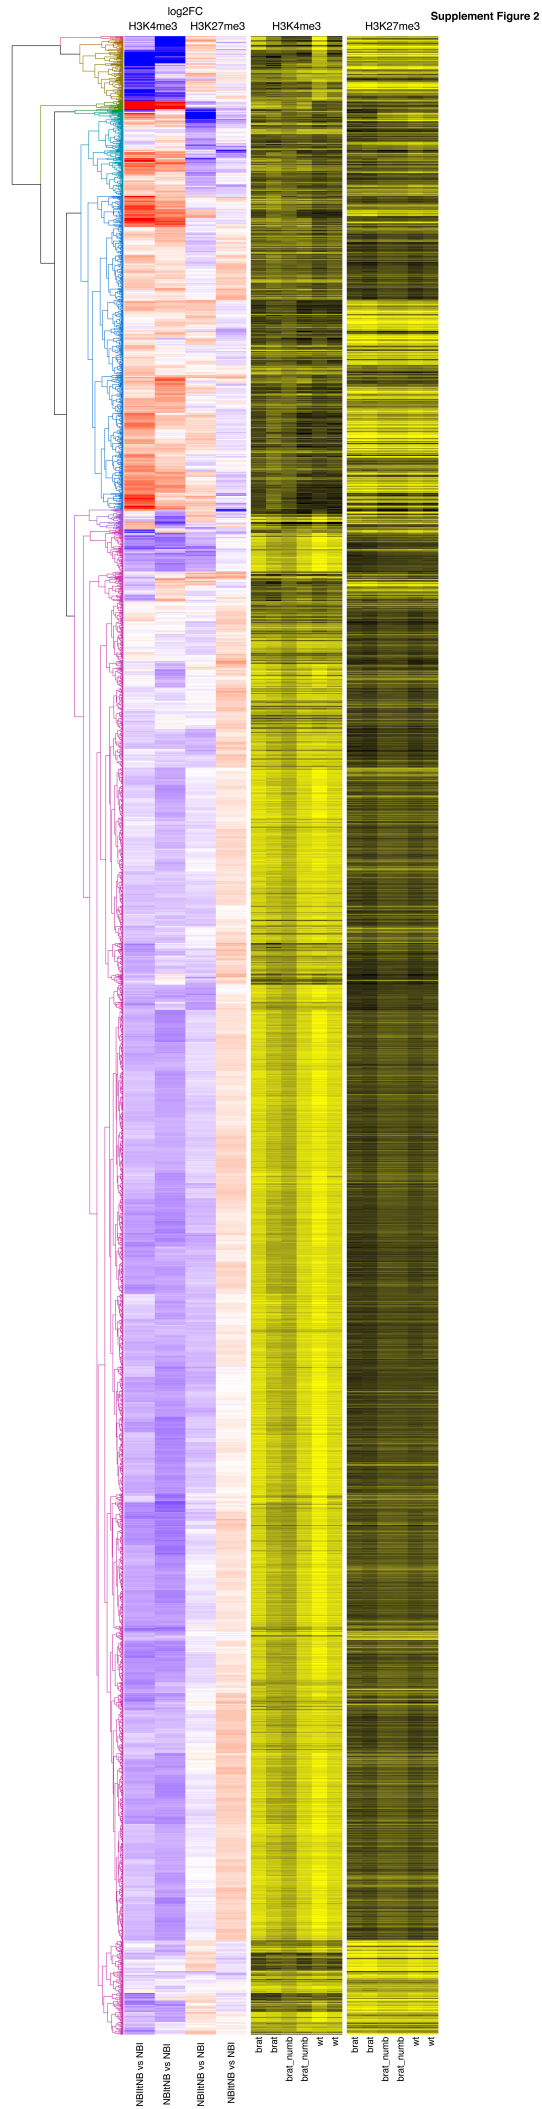



**Figure S2. Full heatmap of H3K4me3 and H3K27me3 changes between NB samples.**

Comprehensive hierarchical clustering analysis for NB samples presented in Figure 3.

## Supplement Figure 3

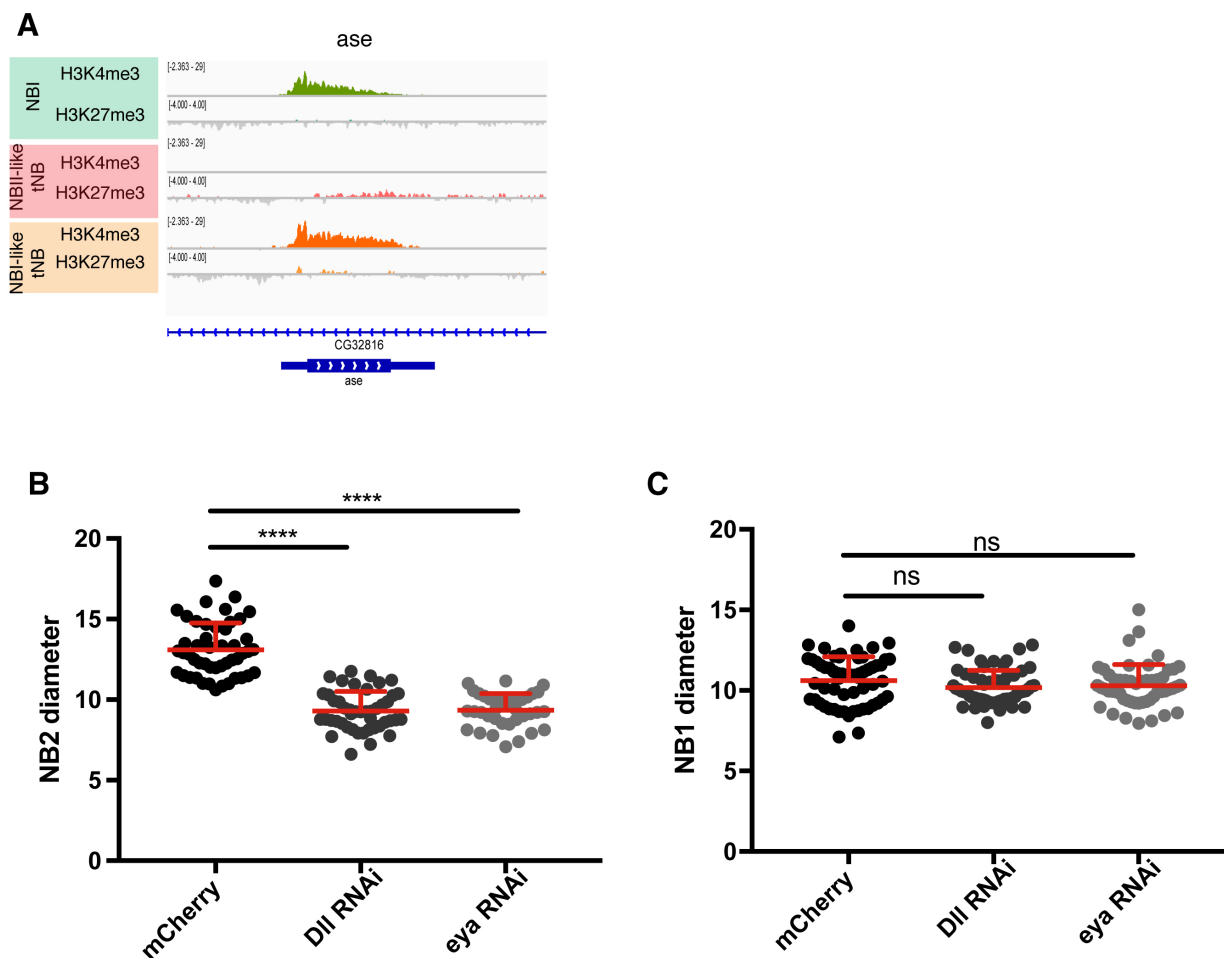

**Figure S3. Dll and eya knockdown affect NBII but not NBI size.**

(A) H3K4me3 and H3K27me3 distribution at the *Asense* locus. Measurements of NBII (B) and NBI (C) diameter. Driver line used was *UAS-dicer2; insc-Gal4, UAS-CD8::GFP*. Mean  $\pm$  SD is shown. (for NBII diameter (B) control =  $13.09 \pm 1.66$  (n = 48), *Dll* =  $9.29 \pm 1.21$  (n = 45) and *eya* =  $9.34 \pm 1.02$  (n = 37), and for NBI diameter (C) control =  $10.61 \pm 1.48$  (n=60), *Dll* =  $10.17 \pm 1.07$  (n=60) and *eya* =  $10.28 \pm 1.33$  (n=52)). One-way ANOVA test was used and \*\*\*\*p < 0.0001, ns = not significant. n numbers are lineages quantified.

## Supplement Figure 4

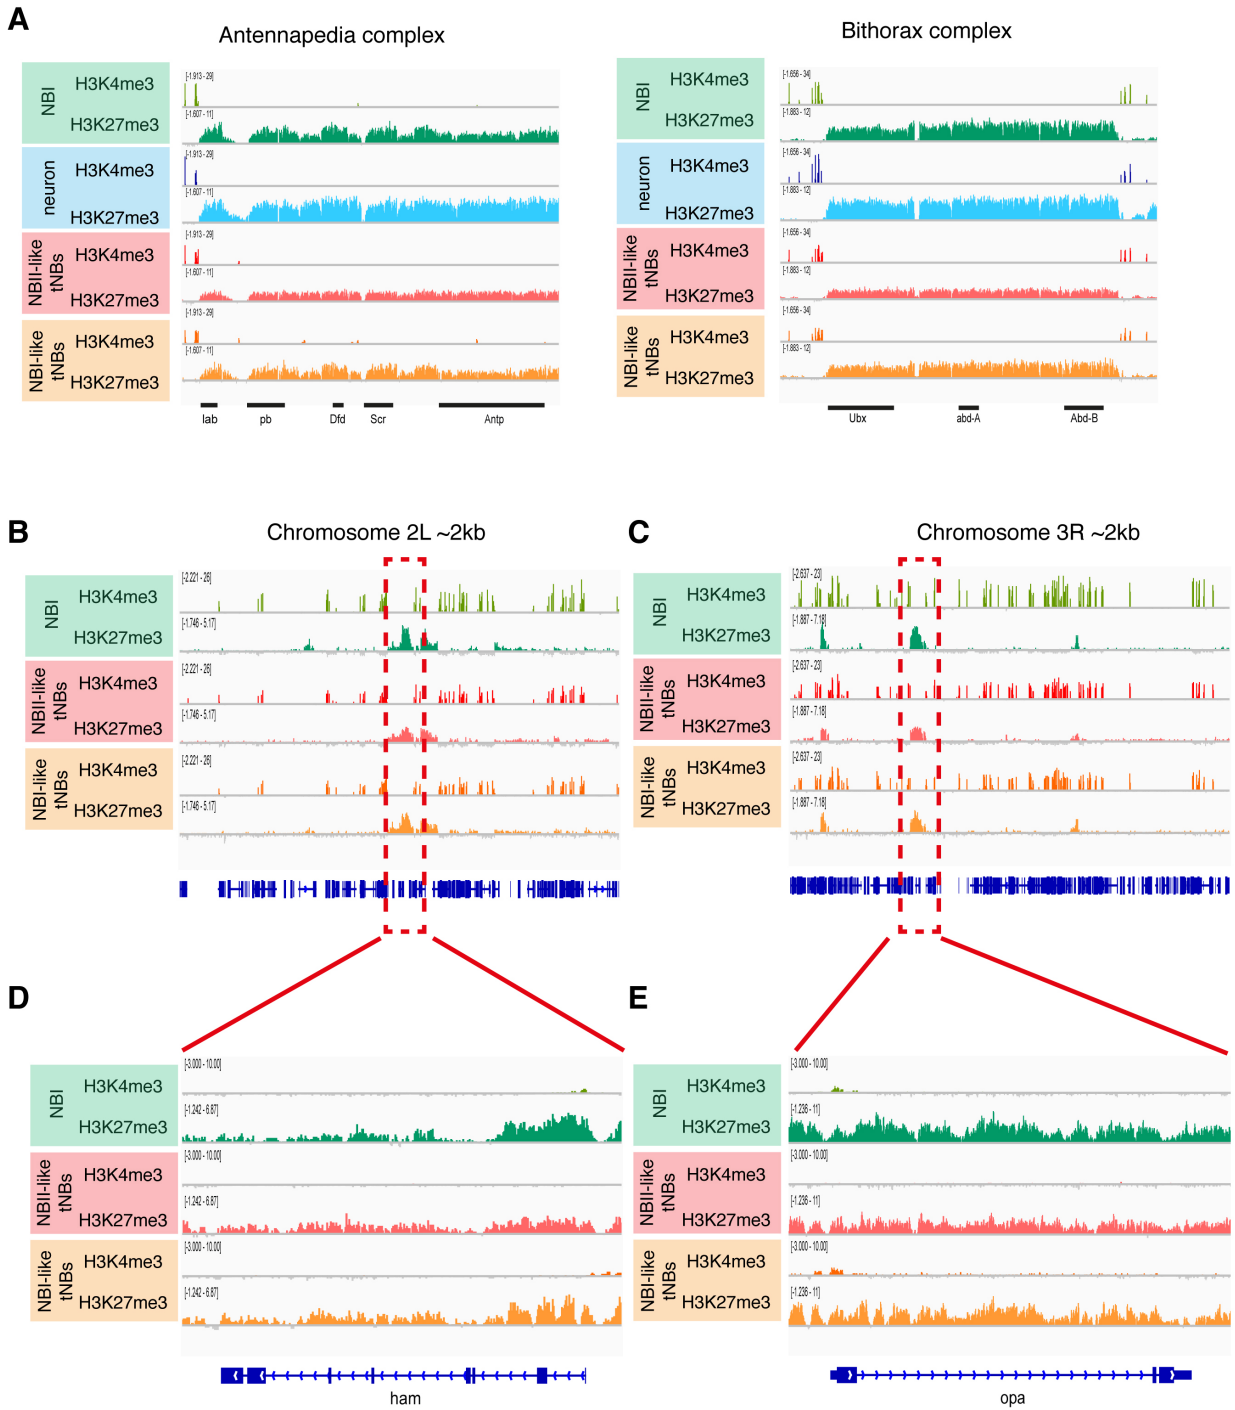

**Figure S4. Examples of regions marked heavily with H3K27me3.**

(A) ChIP-seq tracks of the HOX gene clusters; Antennapedia and Bithorax. H3K4me3 and H3K27me3 distribution of 2 kb region of chromosome 2L (B) and 3R (C). H3K4me3 and H3K27me3 distribution at hamlet locus on chromosome 2L (D) and odd-paired locus on chromosome 3R (E).

## Supplement Figure 5

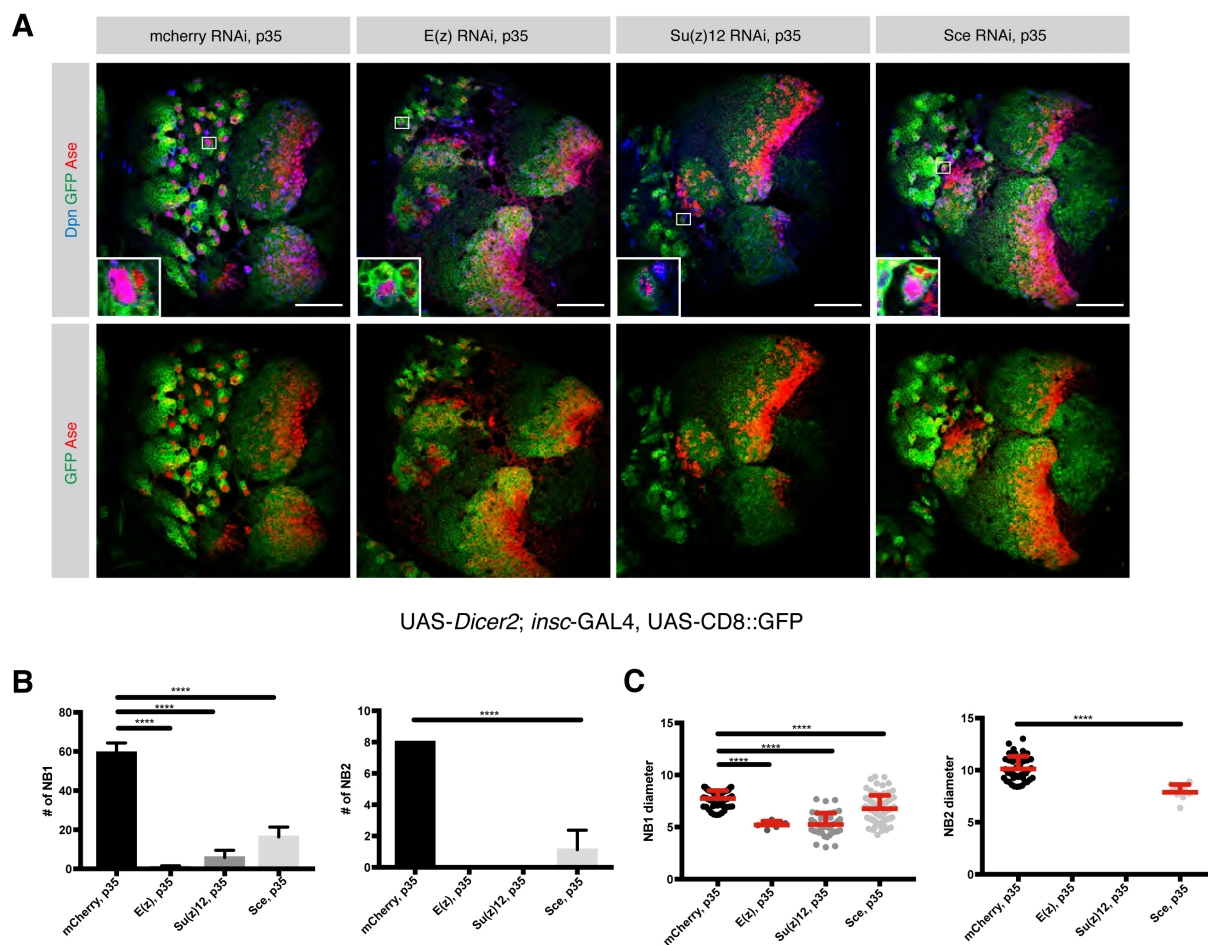

**Figure S5. NBI and NBII neurogenesis depend on PcG with different sensitivity**

(A) Pupal brains expressing apoptosis inhibitor P35 together with mCherry, *E(z)*, *Su(z)* and *Sce* RNAi constructs. PcG loss causes smaller NBI (blow-ups). Scale bar 50  $\mu$ m. Driver line used was UAS-*dicer2*; *insc*-Gal4, UAS-CD8::GFP.

(B) Quantification of NBI and NBII numbers in (A). Mean  $\pm$  SD is shown (for NBI, mCherry+P35 =  $59.43 \pm 4.93$  (n=7), *E(z)*+P35 =  $0.62 \pm 0.91$  (n=8), *Su(z)12*+P35 =  $5.85 \pm 3.62$  (n=8) and *Sce*+P35 =  $16.38 \pm 4.98$  (n=8) and for NBII, mCherry+P35 = 8 (n=7), *E(z)*+P35 = NA, *Su(z)12*+P35 = NA and *Sce*+P35 =  $1.12 \pm 1.24$  (n=8)). One-way ANOVA test was used and \*\*\*\*p < 0.0001. (C) Quantification of NBI and NBII diameter in (A). Mean  $\pm$  SD (for NBI, mCherry+P35 =  $7.74 \pm 0.76$  (n=60), *E(z)*+P35 =  $5.19 \pm 0.37$  (n=5), *Su(z)12*+P35 =  $5.15 \pm 0.92$  (n=41) and *Sce*+P35 =  $5.74 \pm 0.82$  (n=80) and for NBII, mCherry+P35 =  $10.12 \pm 1.2$  (n=43), *E(z)*+P35 = NA, *Su(z)12*+P35 = NA and *Sce*+P35 =  $7.88 \pm 0.73$  (n=9)) One-way ANOVA test was used and \*\*\*\*p < 0.0001.

Supplement Figure 6

A

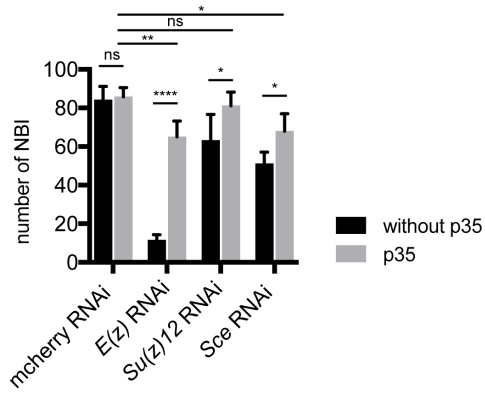

B

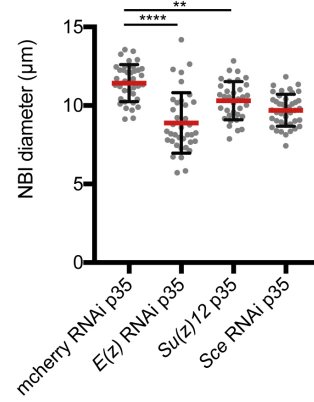

C

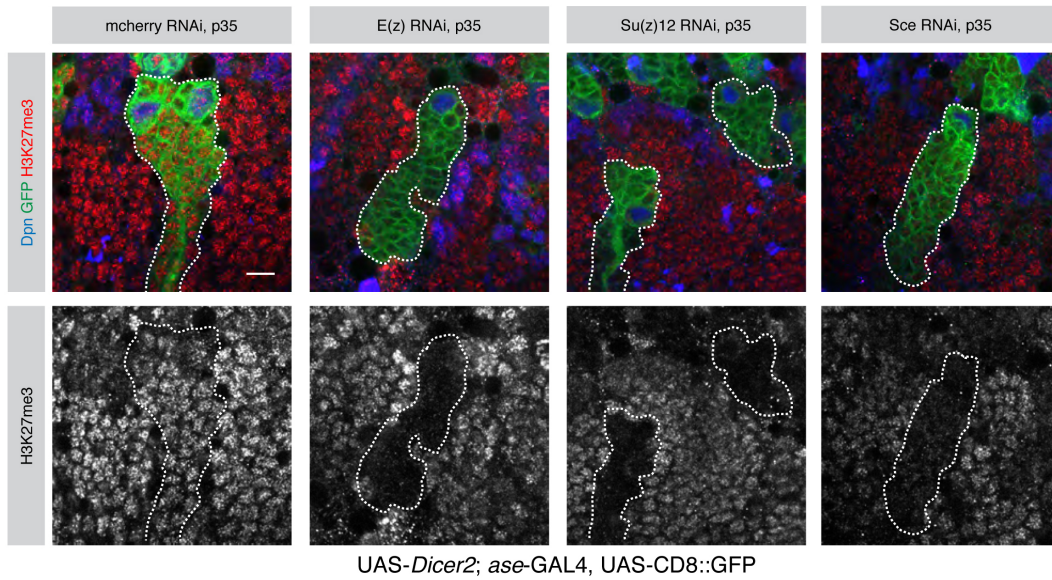

D

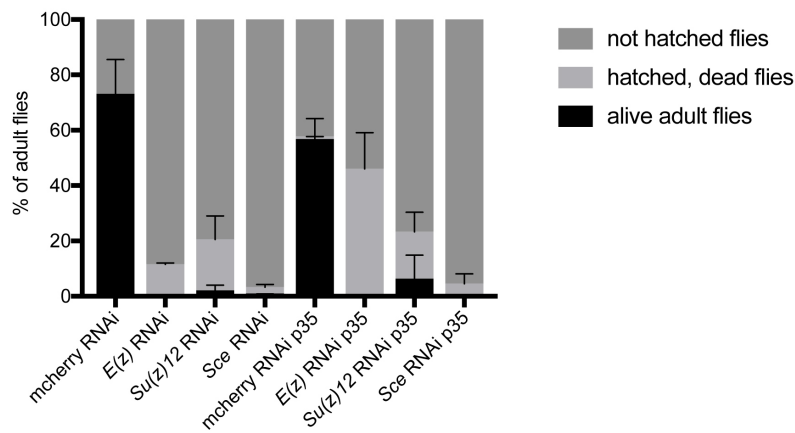

**Figure S6. Blocking apoptosis in PcG depleted NB lineages does not restore neurogenesis.**

(A) Number of NBI in L3 larval brains upon RNAi-depletion of PcG genes with and without blocking apoptosis with p35. Mean  $\pm$  SD. ANOVA test and \*  $p < 0.05$ , \*\*  $p < 0.005$ , \*\*\*  $p < 0.0005$ , ns not significant.  $n = 5$  brain lobes, except for *E(z)* RNAi and *Su(z)12* RNAi  $n = 4$  brain lobes. Driver line UAS-*dicer2*; *ase-GAL4*, UAS-CD8::GFP was used. (B) Quantification of the NBI cell size of apoptosis-blocked mCherry ( $n = 38$ ), *E(z)* ( $n = 37$ ), *Su(z)12* ( $n = 34$ ), *Sce* ( $n = 41$ ) RNAi-depleted NBIs.  $n$  numbers are NBI numbers, each time from 3 different brain lobes. Driver line used was UAS-*dicer2*; *ase-GAL4*, UAS-CD8::GFP. Mean  $\pm$  SD. ANOVA test and \*\*  $p < 0.005$ , \*\*\*\*  $p < 0.00005$ . (C) H3K27me3 levels upon the knockdown of PcG genes. Exemplarily NBI lineages are outlined. Driver line used was UAS-*dicer2*; *ase-GAL4*, UAS-CD8::GFP. Scale bar  $10\mu\text{m}$ . (D) Quantification of adult flies that are alive, hatched but dead and did not hatch. For all conditions  $n = 3$  independent viability assays. UAS-*dicer2*; *ase-GAL4*. Mean  $\pm$  SD.

**Table S1: GO-term analysis of genes with decreased H3K4me3 in neurons compared to NBIs.**

GO-term enrichment analysis for genes of cluster 4 (related to Fig. 2).

[Click here to Download Table S1](#)
